# Supplementary material
Source: Springer Nature journal article supplement (https://www.springermedizin.de/resource/supplementary/12936_2010_1726_MOESM1_ESM.pdf/9541558)
Supplement: MOESM1 [file 9541558]

# BARINGO DISTRICT

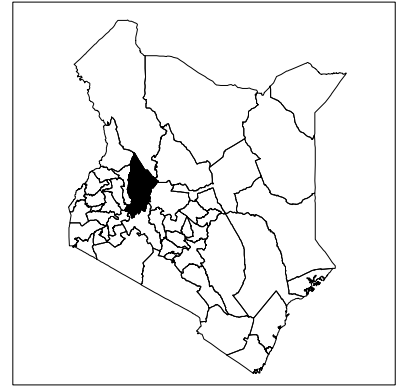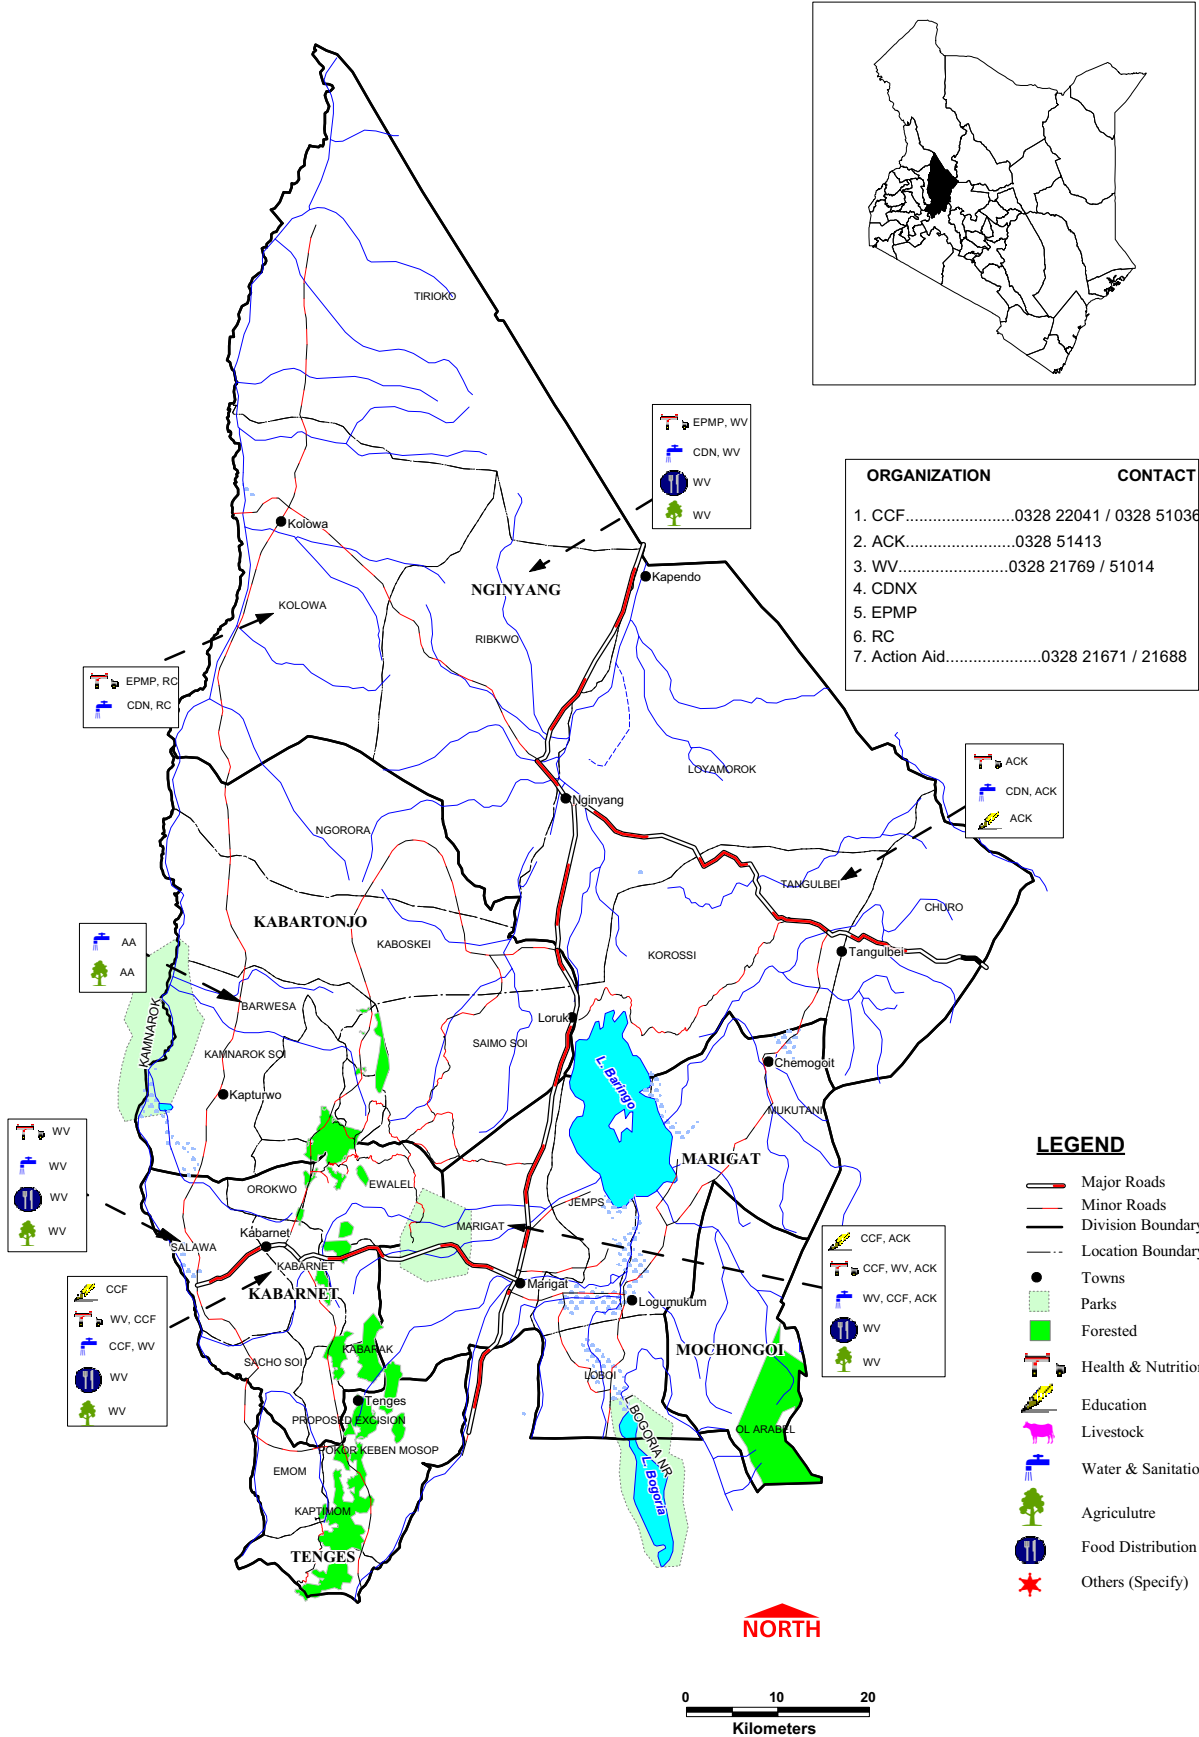

| ORGANIZATION       | CONTACT                 |
|--------------------|-------------------------|
| 1. CCF.....        | 0328 22041 / 0328 51036 |
| 2. ACK.....        | 0328 51413              |
| 3. WV.....         | 0328 21769 / 51014      |
| 4. CDN.....        |                         |
| 5. EPMP            |                         |
| 6. RC              |                         |
| 7. Action Aid..... | 0328 21671 / 21688      |

## LEGEND

- Major Roads
- Minor Roads
- Division Boundary
- Location Boundary
- Towns
- Parks
- Forested
- Health & Nutrition
- Education
- Livestock
- Water & Sanitation
- Agriculture
- Food Distribution
- Others (Specify)

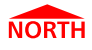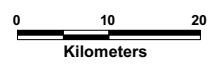

The boundaries and names shown on this map do not imply official endorsement or acceptance by the United Nations
